# Supplementary material for: Electrostatic precipitation Pressurized IntraPeritoneal Aerosol Chemotherapy (ePIPAC): first in-human application
Source: publisher site journal article supplement (doi:10.1515/pp-2016-0005), 2016-04-29
Supplement: Supplementary file 1 [file pp2016.0005_Supplementary_Material_Legends.docx]

**Suppl Material, Video** This videoclip exemplifies the behavior of the therapeutic pressurized intraperitoneal aerosol before and after activation of the electrostatic precipitation system. From the timepoint of activation, the aerosol is vanishing within seconds.

**Suppl Material, Figure S1** Liver toxicity: discrete liver toxicity was observed after ePIPAC that not differed grossly from PIPAC. No hapatocytolysis was detected. Liver metabolism was not significantly impaired after (e)PIPAC application. Liver synthesis function, as monitored by Quick-test, remained within the normal range.
